# Supplementary material
Source: PubMed Central journal article supplement (PMC3587975)
Supplement: NIHMS392329-supplement-supplementary_figue_legend.pdf [file NIHMS392329-supplement-supplementary_figue_legend.pdf]

## Specificity of RGS10A as a key component in the RANKL signaling mechanism for osteoclast differentiation

### JCS008300 Supplementary Material

#### Files in this Data Supplement:

- [Supplemental Figure S1](#) -

**Fig. S1.** RANKL- and M-CSF-induced NF- $\kappa$ B, Erk, and c-Fos signaling are unaltered in *RGS10A*-silenced cells. NF- $\kappa$ B activation in response to RANKL was assessed by western blot analysis of I $\kappa$ B $\alpha$  degradation (A) in BMMs infected with pLenti-R10a or pLenti-scrambled virus.  $\beta$ -actin levels were used as loading control ( $n=3$ ). M-CSF signaling in BMMs infected with pLenti-R10a or pLenti-scrambled virus was determined by western blot analysis of the phosphorylated p42/p44 form of Erk at the indicated times (B).  $\beta$ -actin levels were used as loading control ( $n=3$ ). Expression of c-Fos was determined by RT-PCR in day 2 cells stimulated with M-CSF in BMMs infected with pLenti-R10a or pLenti-scrambled virus for the indicated time (C). GAPDH levels were used as loading control ( $n=3$ ).

- [Supplemental Figure S2](#) -

**Fig. S2.** RGS10A has no interaction with the N-type calcium channel in RANKL-induced OCLs. Precipitation of RGS10A and RGS12 followed by western blotting with an antibody against the  $\alpha_{1B}$ -subunit of the calcium channel. RGS12 directly interacts with the  $\alpha_{1B}$ -subunit of the calcium channel; however, RGS10A has no interaction with the calcium channel in RANKL-induced OCLs.

- [Supplemental Figure S3](#) -

**Fig. S3.** No interaction between RGS10A and calcium sensing receptor. Lane 1, positive controls. RANKL induced OCLs. Lane 2 and 3: RAW264.7 and *RGS10A*-silenced RAW264.7 cells were induced with RANKL for 96 hours. CaR is expressed in pre-osteoclasts and osteoclasts, and RGS12 binds with CaR (lane 2,3); however, RGS10A does not bind with CaR (lane 2,3), indicating RGS10A and RGS12 both play roles in regulating calcium oscillations, but they go through different pathways.

- [Supplemental Figure S4](#) -

**Fig. S4.** Calmodulin binds with RGS10A but not with RGS12. RAW264.7 cells were induced with RANKL for 96 hours. Lane 1: RGS10 and RGS12 are both expressed in RANKL-induced OCLs. Lane 2: RGS10 interacts with CaM, but RGS12 does not bind with CaM.
